# Supplementary material for: Establishment of Patient-Derived Organoids Using Ascitic or Pleural Fluid from Cancer Patients
Source: PubMed Central journal article supplement — Cancer Res Treat. 2023 Jun 12;55(4):1077–86. doi: 10.4143/crt.2022.1630 (PMC10582554; doi:10.4143/crt.2022.1630), 2023-06-12
Supplement: crt-2022-1630_S1_Table.pdf [file crt-2022-1630_S1_Table.pdf]

**S1 Table.** Composition of growth factors for culture medium

| No. | Component                | Company              | Catalog No. | Final concentration |           |           |
|-----|--------------------------|----------------------|-------------|---------------------|-----------|-----------|
|     |                          |                      |             | Breast              | Gastric   | Pancreas  |
| 1   | Advanced DMEM/F12        | Gibco                | 12634-010   |                     |           |           |
| 2   | B27                      | Invitrogen           | 17504-044   | 2%                  | 2%        | 2%        |
| 3   | Glutamax                 | ThermoFisher         | 35050-061   | 1×                  | 1×        | 1×        |
| 4   | HEPES                    | Gibco                | 15630-080   | 10 mM               | 10 mM     | 10 mM     |
| 5   | Conditioned Noggin media | U-protein Express BV | N002        | 1×                  | 1×        | 1×        |
| 6   | Nicotinamide             | Sigma                | N0636       | 5 mM                |           | 10 mM     |
| 7   | Heregulin beta-1         | Peprtech             | 100-03      | 5 nM                |           |           |
| 8   | N-acetylcysteine         | Sigma                | A9165       | 1.25 mM             | 1 mM      | 1.25 mM   |
| 9   | Insulin                  | Gibco                | 12585-014   | 10 µg/mL            |           |           |
| 10  | R-spondin-1              | Qkine                | Qk006       | 50 ng/mL            | 50 ng/mL  | 50 ng/mL  |
| 11  | β-estradiol              | Sigma                | E2758       | 100 nM              |           |           |
| 12  | Hydrocortisone           | Sigma                | H0888       | 1 µg/mL             |           |           |
| 13  | FGF7                     | Peprtech             | 100-19      | 5 ng/mL             |           |           |
| 14  | SB202190                 | Sigma                | S7067       | 500 nM              |           |           |
| 15  | A83-01                   | TOCRIS               | 2939        | 500 nM              | 2 µM      | 5 µM      |
| 16  | FGF10                    | Peprtech             | 100-26      | 20 ng/mL            | 200 ng/mL | 100 ng/mL |
| 17  | EGF                      | Peprtech             | AF-100-15   | 5 ng/mL             | 50 ng/mL  | 50 ng/mL  |
| 18  | Primocin                 | InvivoGen            | ant-pm-2    | 100 µg/mL           | 100 µg/mL | 100 µg/mL |
| 19  | Wnt3a                    | U-protein Express BV | N001        |                     | 5 ng/mL   | 10 ng/mL  |
| 20  | Gastrin                  | Sigma                | G9020       |                     | 1 nM      | 50 nM     |
| 21  | Y-27632 <sup>a)</sup>    | Sigma                | Y0503       | 10 µM               | 10 µM     | 10 µM     |

<sup>a)</sup>Used only after thawing.
