# Supplementary material for: Establishment of Patient-Derived Organoids Using Ascitic or Pleural Fluid from Cancer Patients
Source: PubMed Central journal article supplement — Cancer Res Treat. 2023 Jun 12;55(4):1077–86. doi: 10.4143/crt.2022.1630 (PMC10582554; doi:10.4143/crt.2022.1630), 2023-06-12
Supplement: crt-2022-1630_S6_Fig.pdf [file crt-2022-1630_S6_Fig.pdf]

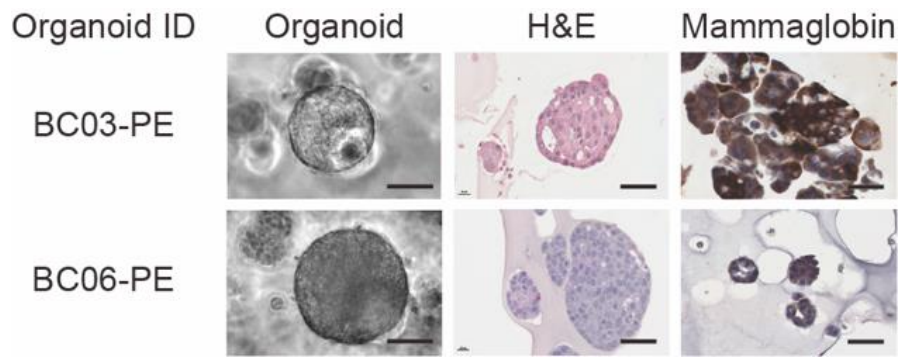

**S6 Fig.** Microscopic images of breast cancer organoids with H&E and immunohistochemical staining of mammaglobin. Scale bars=50  $\mu$ m.
