# Supplementary material for: Establishment of Patient-Derived Organoids Using Ascitic or Pleural Fluid from Cancer Patients
Source: PubMed Central journal article supplement — Cancer Res Treat. 2023 Jun 12;55(4):1077–86. doi: 10.4143/crt.2022.1630 (PMC10582554; doi:10.4143/crt.2022.1630), 2023-06-12
Supplement: crt-2022-1630_S7_Table.pdf [file crt-2022-1630_S7_Table.pdf]

**S7 Table.** List of samples for breast cancer organoids

| Organoid ID | Fluid            | Cytopathology | Success | Clinical subtype | ER(IHC) <sup>a)</sup> | PR(IHC) <sup>a)</sup> | HER2(IHC) |
|-------------|------------------|---------------|---------|------------------|-----------------------|-----------------------|-----------|
| BC01-PE     | Pleural effusion | Positive      | Fail    | HR+ HER2+        | 6                     | 6                     | 3+        |
| BC02-PE     | Pleural effusion | Negative      | Fail    | HR+ HER2-        | 8                     | 6                     | 2+/ISH-   |
| BC03-PE     | Pleural effusion | Positive      | Success | HR- HER2+        | 0                     | 2                     | 3+        |
| BC04-PE     | Pleural effusion | Negative      | Fail    | TNBC             | 0                     | 0                     | 0         |
| BC05-PE     | Pleural effusion | Positive      | Fail    | HR+ HER2-        | 8                     | 4                     | 2+/ISH-   |
| BC06-PE     | Pleural effusion | Positive      | Success | TNBC             | 0                     | 0                     | 0         |
| BC07-PE     | Pleural effusion | Positive      | Fail    | TNBC             | 0                     | 0                     | 1+        |
| BC08-PE     | Pleural effusion | Negative      | Fail    | TNBC             | 0                     | 0                     | 1+        |
| BC09-PE     | Pleural effusion | Negative      | Fail    | HR+ HER2+        | 7                     | 7                     | 3+        |
| BC10-PE     | Pleural effusion | Negative      | Fail    | HR+ HER2+        | 4                     | 0                     | 1+        |

ER, estrogen receptor; HER2, human epidermal growth factor receptor 2; HR, hormone receptor; IHC, immunohistochemical staining; ISH, in-situ hybridization; PR, progesterone receptor; TNBC, triple-negative breast cancer. <sup>a)</sup>Immunohistochemical staining for ER and PR were assessed by the Allred score, of which 3 or higher indicates a positive staining result.
