# Supplementary material for: Establishment of Patient-Derived Organoids Using Ascitic or Pleural Fluid from Cancer Patients
Source: PubMed Central journal article supplement — Cancer Res Treat. 2023 Jun 12;55(4):1077–86. doi: 10.4143/crt.2022.1630 (PMC10582554; doi:10.4143/crt.2022.1630), 2023-06-12
Supplement: crt-2022-1630_S8_Table.pdf [file crt-2022-1630_S8_Table.pdf]

**S8 Table.** Concordance of *KRAS* mutation profiles between patient's ctDNA and organoids

| Organoid ID | <i>KRAS</i> mutation (plasma ctDNA) | <i>KRAS</i> mutation (organoid) |
|-------------|-------------------------------------|---------------------------------|
| PC02-PE     | G12D                                | G12D                            |
| PC03-A      | G12V                                | G12V                            |
| PC07-PE     | G12V                                | G12V                            |
| PC08-A2     | G12D                                | G12D                            |
| PC10-A1     | G12V                                | G12V                            |
| PC12-A      | G12D                                | G12D                            |
| PC13-PE     | G12R                                | G12R                            |

ctDNA, circulating tumor DNA.
