# Supplementary material for: Establishment of Patient-Derived Organoids Using Ascitic or Pleural Fluid from Cancer Patients
Source: PubMed Central journal article supplement — Cancer Res Treat. 2023 Jun 12;55(4):1077–86. doi: 10.4143/crt.2022.1630 (PMC10582554; doi:10.4143/crt.2022.1630), 2023-06-12
Supplement: crt-2022-1630_S9_Fig.pdf [file crt-2022-1630_S9_Fig.pdf]

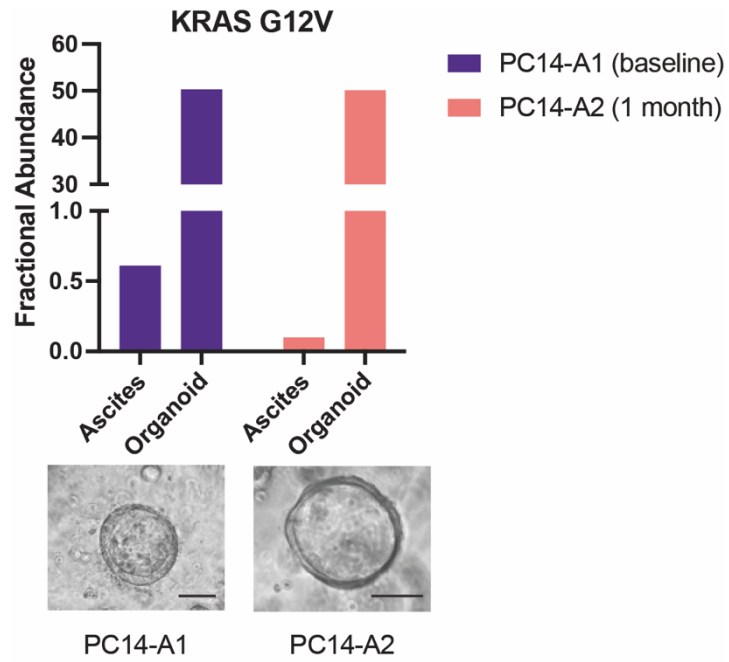

**S9 Fig.** Fractional abundance of *KRAS* G12V variant by droplet digital polymerase chain reaction performed with ascites and tumor organoids in pancreatic cancer. Microscopic images of matching organoids are shown below. Scale bars=100  $\mu$ m.
