# Supplementary material for: Establishment of Patient-Derived Organoids Using Ascitic or Pleural Fluid from Cancer Patients
Source: PubMed Central journal article supplement — Cancer Res Treat. 2023 Jun 12;55(4):1077–86. doi: 10.4143/crt.2022.1630 (PMC10582554; doi:10.4143/crt.2022.1630), 2023-06-12
Supplement: crt-2022-1630_S11_Table.pdf [file crt-2022-1630_S11_Table.pdf]

**S11 Table.** AUC values of dose-response curves for each chemotherapeutic agent by the organoids tested

| Organoid ID | 5-FU  | Irinotecan | Oxaliplatin | Gemcitabine | nab-Paclitaxel | Cisplatin | Carboplatin | Erlotinib | Epirubicin |
|-------------|-------|------------|-------------|-------------|----------------|-----------|-------------|-----------|------------|
| PC07-PE     | 0.859 | 0.756      | 0.899       | 0.649       | 0.663          | 0.652     | 0.948       | 0.810     | 0.535      |
| PC08-A2     | 0.945 | 0.938      | 0.875       | 0.789       | 0.212          | 0.797     | 0.874       | 0.684     | 0.589      |
| PC10-A1     | 0.563 | 0.588      | 0.772       | 0.333       | 0.325          | 0.634     | 0.850       | 0.584     | 0.386      |
| PC10-A2     | 0.519 | 0.421      | 0.823       | 0.469       | 0.460          | 0.560     | 0.681       | 0.723     | 0.348      |
| PC13-PE     | 0.383 | 0.349      | 0.661       | 0.322       | 0.322          | 0.465     | 0.944       | 0.546     | 0.399      |
| PC14-A1     | 0.984 | 0.923      | 0.907       | 0.899       | 0.899          | 0.859     | 0.913       | 0.821     | 0.582      |
| PC14-A2     | 0.808 | 0.715      | 0.905       | 0.631       | 0.631          | 0.853     | 0.957       | 0.623     | 0.552      |
| PC14-A3     | 0.806 | 0.669      | 0.845       | 0.536       | 0.536          | 0.817     | 0.835       | 0.614     | 0.415      |

AUC, area under the dose-response curve; 5-FU, 5-fluorouracil.
